# Supplementary material for: A white-to-opaque-like phenotypic switch in the yeast Torulaspora microellipsoides
Source: PubMed Central journal article supplement (PMC7048803; doi:10.1038/s42003-020-0815-6), 2020-02-28
Supplement: 42003_2020_815_MOESM1_ESM.pdf [file 42003_2020_815_MOESM1_ESM.pdf]

1 **Supplementary Figures**

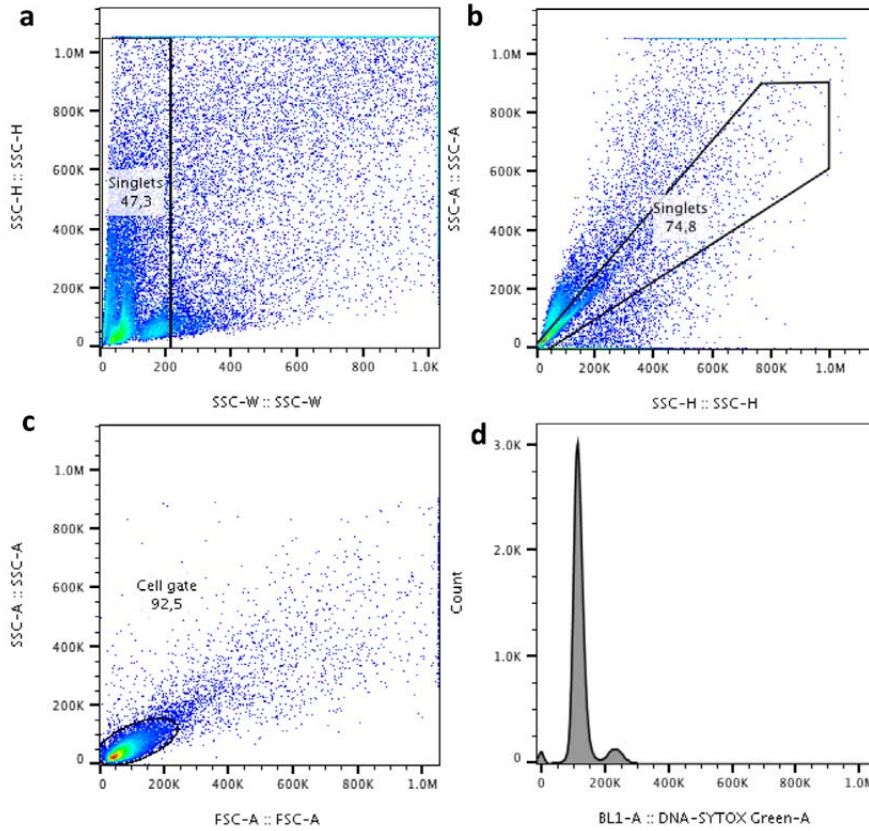

2

3 **Supplementary Figure 1.** Flow cytometry gating strategy for DNA content analysis of *T.*  
4 *microellipsoides* isolates. Example shown is for WT white cells.

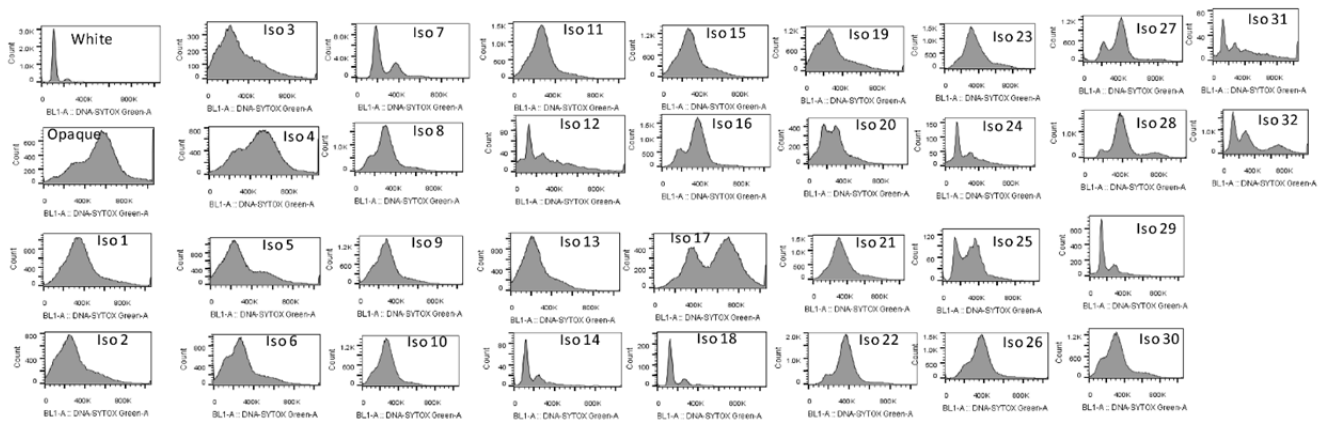

5

6 **Supplementary Figure 2.** Ploidy analysis of white, opaque, and 32 opaque-derived isolated of  
7 *T. microellipsoides*, as measured by flow cytometry.

8

9

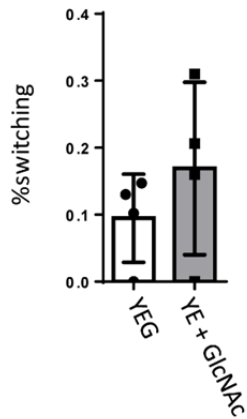

10

11 **Supplementary Figure 3.** White to opaque switching rate of WT cells grown on either YEG or  
 12 YEG + 2% N-acetyl glucosamine (GlcNAc). Error bars represent the standard deviation of the  
 13 mean. N=3 independent experiments. Error bars represent the standard deviation of the mean;  
 14 significance values are shown in Supplementary Data 1.

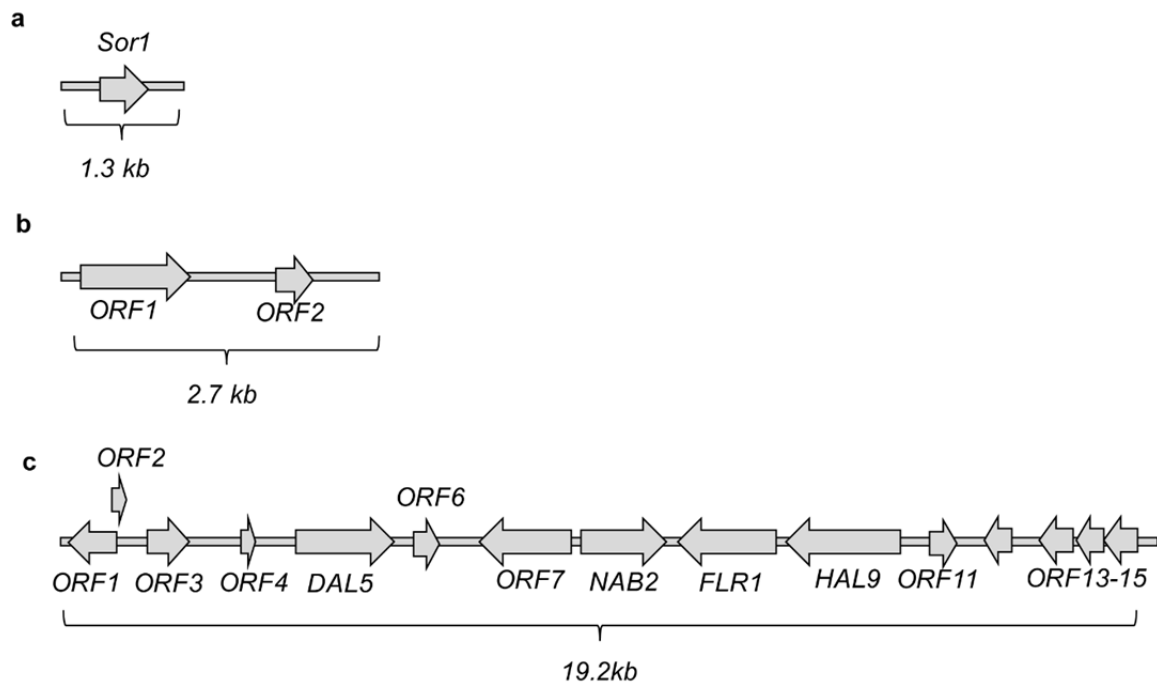

15

16 **Supplementary Figure 4.** Schematic representation of putatively translocated regions in the  
 17 genome of opaque cells compared to white cells. **a**, Schematic map of the 1.3 kb translocated  
 18 region between white and opaque cells. **b**, Schematic map of the 2.7 kb translocated region  
 19 between white and opaque cells. **c**, Schematic map of the 19.2 kb putative translocated region  
 20 between white and opaque cells. Annotations are based off alignment to the *S. cerevisiae* or *C.*  
 21 *alibicans* homologues. Un-annotated ORF's are those for which a homologue was not detected.  
 22 DAL5 denotes "degradation of Allantoin 5", NAB2 denotes "Nuclear polyAdenylated RNA-  
 23 binding 2", FLR1 denotes "Fluconazole Resistance 1", and HAL9 denotes "HALotolerance 9".

24

25

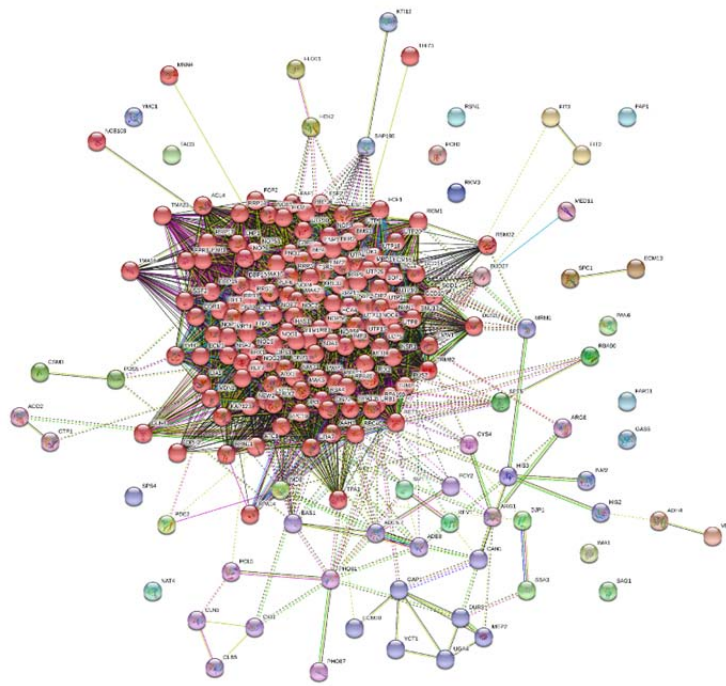

| Biological Process                                              |                   |                        |
|-----------------------------------------------------------------|-------------------|------------------------|
| description                                                     | count in gene set | false discovery rate   |
| Ribosome biogenesis                                             | 112 of 403        | $9.92 \times 10^{-75}$ |
| ribonucleoprotein complex biogenesis                            | 113 of 485        | $1.24 \times 10^{-68}$ |
| rRNA metabolic process                                          | 92 of 320         | $5.48 \times 10^{-60}$ |
| ncRNA metabolic process                                         | 104 of 494        | $4 \times 10^{-58}$    |
| rRNA processing                                                 | 86 of 277         | $7.02 \times 10^{-58}$ |
| Molecular function                                              |                   |                        |
| description                                                     | count in gene set | false discovery rate   |
| RNA binding                                                     | 75 of 669         | $2.47 \times 10^{-22}$ |
| snoRNA binding                                                  | 20 of 26          | $2.09 \times 10^{-17}$ |
| nucleic acid binding                                            | 87 of 1234        | $1.92 \times 10^{-14}$ |
| mRNA binding                                                    | 31 of 188         | $4.13 \times 10^{-12}$ |
| heterocyclic compound binding                                   | 102 of 1925       | $6.89 \times 10^{-10}$ |
| Cellular Component                                              |                   |                        |
| description                                                     | count in gene set | false discovery rate   |
| nucleolus                                                       | 105 of 308        | $3.05 \times 10^{-77}$ |
| preribosome                                                     | 77 of 182         | $1.82 \times 10^{-59}$ |
| nuclear lumen                                                   | 119 of 855        | $8.4 \times 10^{-52}$  |
| intracellular organelle lumen                                   | 123 of 1180       | $1.91 \times 10^{-41}$ |
| 90S preribosome                                                 | 43 of 90          | $1.34 \times 10^{-33}$ |
| KEGG Pathways                                                   |                   |                        |
| description                                                     | count in gene set | false discovery rate   |
| ribosome biogenesis in eukaryotes                               | 30 of 73          | $2.19 \times 10^{-21}$ |
| RNA polymerase                                                  | 8 of 30           | 0.00017                |
| purine metabolism                                               | 13 of 99          | 0.0002                 |
| pyrimidine metabolism                                           | 9 of 71           | 0.004                  |
| Reactome pathways                                               |                   |                        |
| description                                                     | count in gene set | false discovery rate   |
| major pathway of rRNA processing in the nucleolus nad cytoplasm | 26 of 56          | $6.62 \times 10^{-19}$ |
| metabolism of RNA                                               | 30 of 271         | $4.01 \times 10^{-8}$  |
| RNA polymerase I transcription                                  | 4 of 11           | 0.0197                 |

26

27 **Supplementary Figure 5.** Graphical representation of STRING-analysis of genes upregulated  
 28 in opaque compared to white cells, shown on the left. Shown on the right is a table of biological  
 29 and molecular functions enriched in this data set, as cell as cellular components and KEGG  
 30 pathways.

31

32

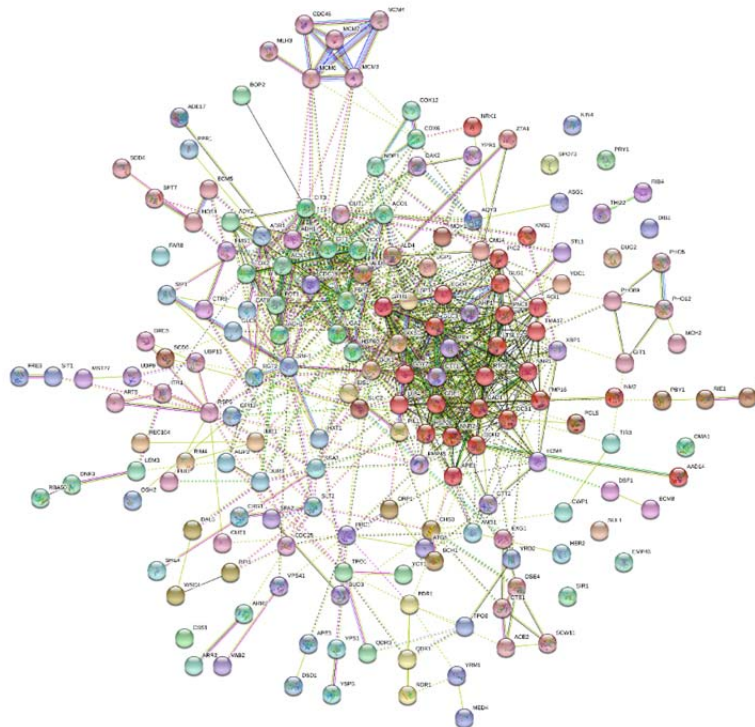

| Biological Process                       |                   |                       |
|------------------------------------------|-------------------|-----------------------|
| description                              | count in gene set | false discovery rate  |
| carbohydrate metabolic process           | 30 of 252         | 3.4x 10 <sup>-8</sup> |
| cellular carbohydrate metabolic process  | 21 of 163         | 6.43X10 <sup>-6</sup> |
| oxidation-reduction process              | 34 of 445         | 2.35x10 <sup>-5</sup> |
| carbohydrate catabolic process           | 13 of 84          | 0.00041               |
| polysaccharide metabolit process         | 13 of 89          | 0.00059               |
|                                          |                   |                       |
| Molecular function                       |                   |                       |
| description                              | count in gene set | false discovery rate  |
| catalytic activity                       | 92 of 2212        | 0.00014               |
| transporter activity                     | 29 of 415         | 0.00063               |
| transmembrane transporter activity       | 25 of 347         | 0.0013                |
| secondary active transmembrane transport | 12 of 89          | 0.0013                |
| hydrolase activity, O-glycosyl comounts  | 9 of 48           | 0.0013                |
|                                          |                   |                       |
| Cellular Component                       |                   |                       |
| description                              | count in gene set | false discovery rate  |
| cell periphery                           | 55 of 790         | 7.06x10 <sup>-9</sup> |
| plasma membrane                          | 40 of 528         | 4.24x10 <sup>-7</sup> |
| cell                                     | 167 of 5412       | 9.38x10 <sup>-5</sup> |
| cell part                                | 166 of 5410       | 0.00023               |
| CMG complex                              | 5 of 11           | 0.0022                |
|                                          |                   |                       |
| KEGG Pathways                            |                   |                       |
| description                              | count in gene set | false discovery rate  |
| starch and sucrose metabolism            | 10 of 40          | 2.75x10 <sup>-5</sup> |
| metabolic pathways                       | 38 of 716         | 0.0011                |
| biosynthesis of secondary metabolites    | 20 of 295         | 0.0036                |
| glycolysis/gluconeogenesis               | 8 of 55           | 0.0036                |
| carbon metabolism                        | 11 of 112         | 0.004                 |

33

34 **Supplementary Figure 6.** Graphical representation of STRING-analysis of genes upregulated  
 35 in white compared to opaque cells, showing known or predicted protein-protein interactions,  
 36 shown on the left. Shown on the right is a table of biological and molecular functions enriched in  
 37 this data set, as cell as cellular components and KEGG pathways.

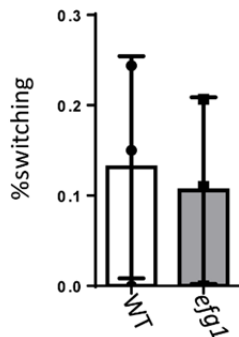

38

39 **Supplementary Figure 7.** White to opaque switching rate of WT and *efg1* deletion strain, on  
 40 either standard YEG plates. N=3 independent experiments. Error bars represent the standard  
 41 deviation of the mean; significance values are shown in Supplementary Data 1.

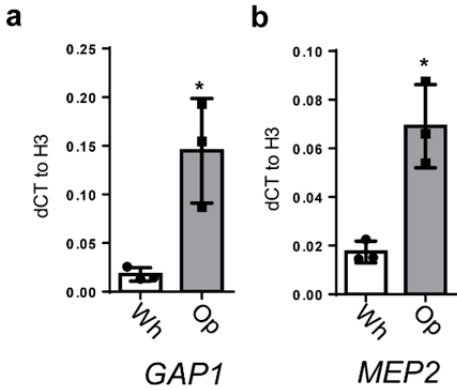

42

43 **Supplementary Figure 8.** Expression analysis of the homologues of **a**, *GAP1* and **b**, *MEP2* in  
 44 *T. microellipsoides* white and opaque cells, as measured RT-qPCR. N=3 independent cultures.  
 45 Error bars represent the standard deviation of the mean; significance values are shown in  
 46 Supplementary Data 1.

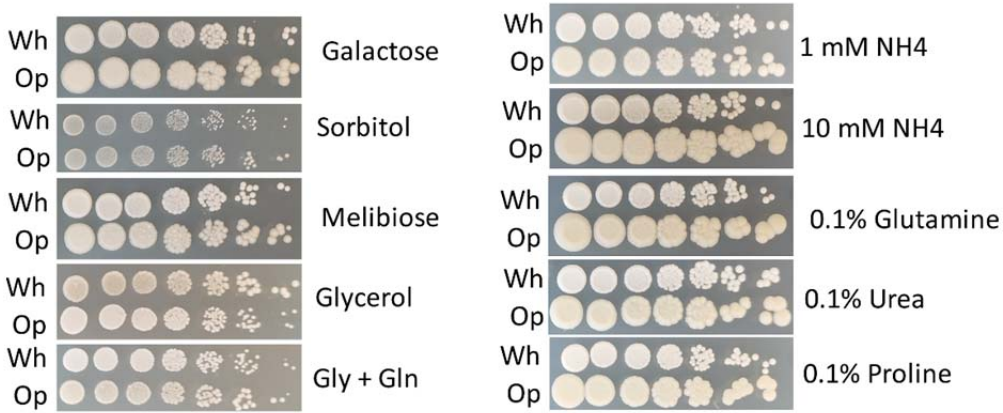

Gly + Gln = 2% glycerol + 0.05% Glucosamine

47

48 **Supplementary Figure 9.** Growth of white and opaque cells on YNB + various carbon and  
 49 nitrogen sources, assayed by dilution plating.

50

51

52



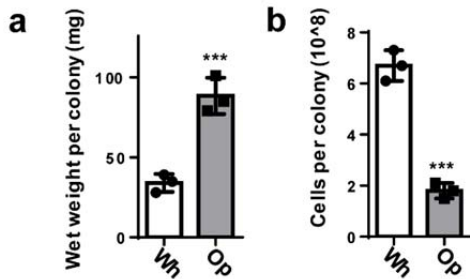

53

54 **Supplementary Figure 10. a**, quantification of colony mass of white and opaque cells by  
 55 measurements of wet weight of single colonies. **b**, Quantification of number of cells per colony  
 56 of white and opaque cells. N=3 independent colonies. Error bars represent the standard  
 57 deviation of the mean; significance values are shown in Supplementary Data 1.

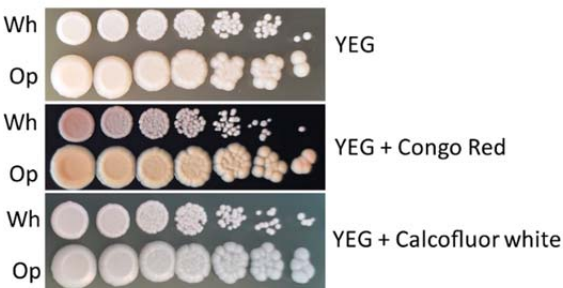

58

59 **Supplementary Figure 11.** Growth of white and opaque cells on YEG, YEG + Congo Red, and  
 60 YEG + Calcofluor white, as assay by dilution plating.

61

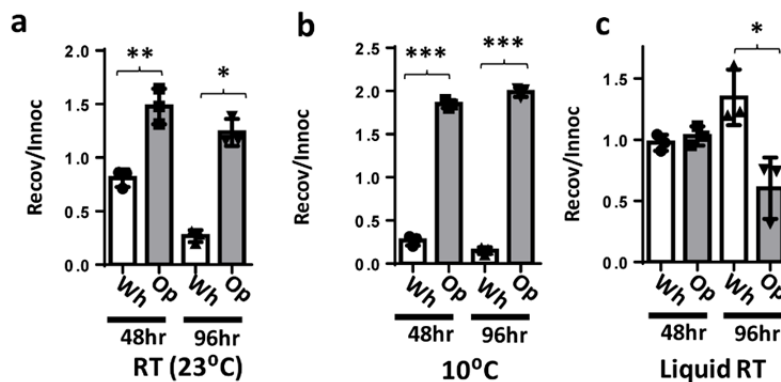

62

63 **Supplementary Figure 12. a**, Relative competitive fitness of white and opaque cells grown on  
 64 agar plates at room temperature after 48 and 96 hours. **b**, Relative competitive fitness of white  
 65 and opaque cells grown in agar plates at 10 °C after 48 and 96 hours. **c**, Relative competitive  
 66 fitness of white and opaque cells grown in liquid YEG after 96 hours. N=3 independent  
 67 experiments. Error bars represent the standard deviation of the mean; significance values are  
 68 shown in Supplementary Data 1.

69

70 **Supplementary Figure 13.** Un-cropped gel image of Figure 1f.

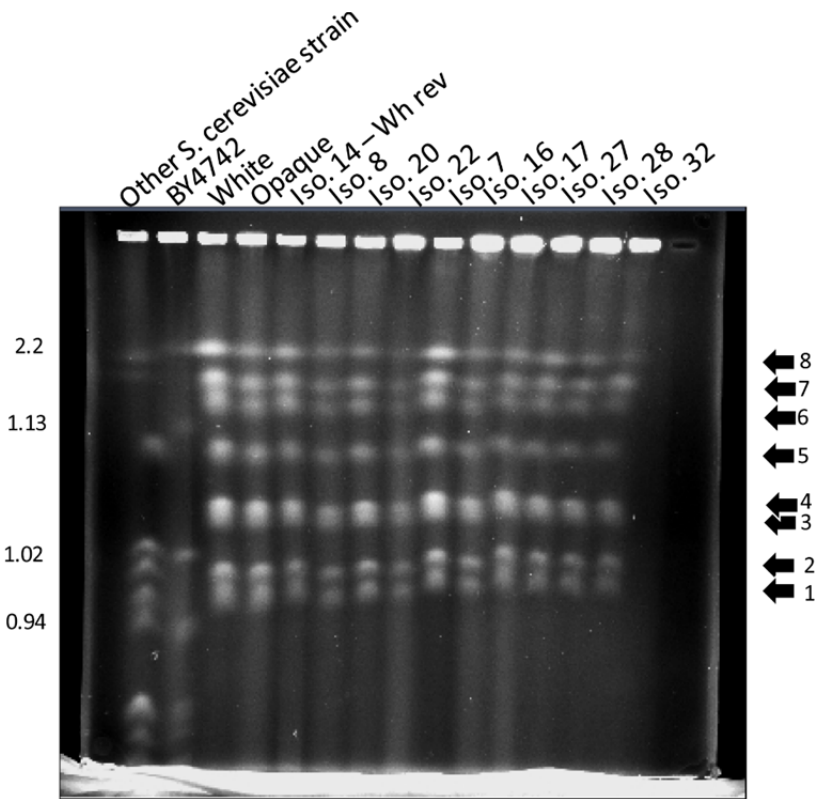

71

72 **Supplementary Tables**

73 **Supplementary Table 1.** Putative translocated regions in opaque cells compared to white cells.

|                          | <b>Gene homologue</b> | <b>Putative function(s)</b> | <b>Differential expression between white and opaque? (log<sub>2</sub>-fold change 2 or greater)</b> |
|--------------------------|-----------------------|-----------------------------|-----------------------------------------------------------------------------------------------------|
| <b>Region A (1.3 kb)</b> | SOR1                  | Sorbitol dehydrogenase      | No                                                                                                  |
| <b>Region B (2.7 kb)</b> | ORF1                  | No identifiable homologue   | No                                                                                                  |
|                          | ORF2                  | No identifiable homologue   | No                                                                                                  |
| <b>Region</b>            | ORF1                  | No identifiable homologue   | No                                                                                                  |

|                    |       |                                                                                                                                                                                                                                                                                                                                                                                                    |    |
|--------------------|-------|----------------------------------------------------------------------------------------------------------------------------------------------------------------------------------------------------------------------------------------------------------------------------------------------------------------------------------------------------------------------------------------------------|----|
| <b>C (19.2 kb)</b> |       |                                                                                                                                                                                                                                                                                                                                                                                                    |    |
|                    | ORF2  | No identifiable homologue                                                                                                                                                                                                                                                                                                                                                                          | No |
|                    | ORF3  | No identifiable homologue                                                                                                                                                                                                                                                                                                                                                                          | No |
|                    | ORF4  | No identifiable homologue                                                                                                                                                                                                                                                                                                                                                                          | No |
|                    | DAL5  | Allantoate permease;<br>ureidosuccinate permease;<br>transports dipeptides                                                                                                                                                                                                                                                                                                                         | No |
|                    | ORF6  | No identifiable homologue                                                                                                                                                                                                                                                                                                                                                                          | No |
|                    | ORF7  | No identifiable homologue                                                                                                                                                                                                                                                                                                                                                                          | No |
|                    | NAB2  | Nuclear polyadenylated RNA-binding protein; required for nuclear mRNA export and poly(A) tail length control; stimulates RNA polymerase III transcription by enhancing TFIIIB binding to promoters; protects mRNA against decay by the nuclear exosome in a poly(A)-tail-dependent manner; involved in forming export-competent mRNPs in the nucleus; autoregulates mRNA levels; NLS binds Kap104p | No |
|                    | FLR1  | Plasma membrane transporter of the major facilitator superfamily; member of the 12-spanner drug:H(+) antiporter DHA1 family; involved in efflux of fluconazole, diazaborine, benomyl, methotrexate, and other drugs                                                                                                                                                                                | No |
|                    | HAL9  | Putative transcription factor containing a zinc finger; overexpression increases salt tolerance through increased expression of the ENA1 (Na <sup>+</sup> /Li <sup>+</sup> extrusion pump) gene while gene disruption decreases both salt tolerance and ENA1 expression                                                                                                                            | No |
|                    | ORF11 | No identifiable homologue                                                                                                                                                                                                                                                                                                                                                                          | No |
|                    | ORF12 | No identifiable homologue                                                                                                                                                                                                                                                                                                                                                                          | No |
|                    | ORF13 | No identifiable homologue                                                                                                                                                                                                                                                                                                                                                                          | No |
|                    | ORF14 | No identifiable homologue                                                                                                                                                                                                                                                                                                                                                                          | No |



|  |       |                           |    |
|--|-------|---------------------------|----|
|  | ORF15 | No identifiable homologue | No |
|--|-------|---------------------------|----|

74

75 **Supplementary Table 2.** Primers, plasmids and strains used in this study.

| <b>Systematic name</b> | <b>Specific use</b>                                                       | <b>Primer sequence (5' to 3')</b>                       |
|------------------------|---------------------------------------------------------------------------|---------------------------------------------------------|
| CB276                  | <i>T. microellipsoides</i><br>Histone H3 forward                          | CATCTGCTATTGGTGCTTTGC                                   |
| CB277                  | <i>T. microellipsoides</i><br>Histone H3 reverse                          | CACGCTTAGCATGAATAGCAG                                   |
| CB299                  | <i>T. microellipsoides</i><br>EFG1 knockout<br>construct forward          | TACAGGGATCCGCTGTGTAGGGTGCTTCAT                          |
| CB300                  | <i>T. microellipsoides</i><br>EFG1 knockout<br>construct reverse          | GTAGCAGGTACCCAACCTCCCTCGTAATGA<br>TCC                   |
| CB301                  | <i>T. microellipsoides</i><br>EFG1 knockout<br>backbone primer<br>forward | GGAGGGTATTCTGGGCCTCCATGTCCGCCA<br>TAACTCCATCATAAGATGGC  |
| CB302                  | <i>T. microellipsoides</i><br>EFG1 knockout<br>backbone primer<br>reverse | TATGTGAATGCTGGTCGCTATACTGAAACCT<br>TTGACAATATTTTGAAGAC  |
| CB303                  | <i>T. microellipsoides</i><br>EFG1 KanMX<br>middle forward                | GCCATCTTATGATGGAGTTATGGCGGACAT<br>GGAGGCCCAAGAATACCCTCC |
| CB304                  | <i>T. microellipsoides</i><br>EFG1 KanMX<br>middle reverse                | GTCTTCAAAATATTGTCAAAGGTTTCAGTAT<br>AGCGACCAGCATTACATA   |
| CB307                  | <i>T. microellipsoides</i><br>EFG1 KanMX<br>integration check<br>forward  | CTGACATTGACCCTCCAAAG                                    |
| CB025                  | KanMX integration<br>check forward                                        | CCCATATAAATCAGCATCCATG                                  |
| CB026                  | KanMX integration<br>check reverse                                        | TATGGTATTGATAATCCTGATATG                                |
| CB280                  | <i>T. microellipsoides</i><br>EFG1 qPCR<br>forward                        | <b>GTA AACTGAGCAGGAATCGG</b>                            |
| CB281                  | <i>T. microellipsoides</i><br>EFG1 qPCR<br>reverse                        | GTAACATGCCCAATAGACAAAC                                  |
| CB493                  | <i>T. microellipsoides</i><br>CTT1 qPCR                                   | GGTCCAAGGGGTA CTCCG                                     |

|       |                                                     |                           |
|-------|-----------------------------------------------------|---------------------------|
|       | forward                                             |                           |
| CB494 | <i>T. microellipsoides</i><br>CTT1 qPCR<br>reverse  | CCATTCTCAGGACGGACATG      |
| CB495 | <i>T. microellipsoides</i><br>GAP1 qPCR<br>forward  | GGTGGTGCCATTGGTACTG       |
| CB496 | <i>T. microellipsoides</i><br>GAP1 qPCR<br>reverse  | CACCAACAGACATCACCATACAG   |
| CB497 | <i>T. microellipsoides</i><br>GLK1 qPCR<br>forward  | GGAGCTGTTGAGAAATATGCTTG   |
| CB498 | <i>T. microellipsoides</i><br>GLK1 qPCR<br>reverse  | TGTGCGATAAAACCTCACTCG     |
| CB499 | <i>T. microellipsoides</i><br>MEP2 qPCR<br>forward  | CCACATTCCGTTACCTCAGTT     |
| CB500 | <i>T. microellipsoides</i><br>MEP2 qPCR<br>reverse  | GTGTTCATAGCAGAATACCAAGC   |
| CB501 | <i>T. microellipsoides</i><br>SSA3 qPCR<br>forward  | GAGAGCATTGTCCTCGTCTTC     |
| CB502 | <i>T. microellipsoides</i><br>SSA3 qPCR<br>reverse  | GTCGATCTGAACATGTCAGCAC    |
| CB503 | <i>T. microellipsoides</i><br>RPL30 qPCR<br>forward | GTTGGCTTTAGTTGTCAAGTCTG   |
| CB504 | <i>T. microellipsoides</i><br>RPL30 qPCR<br>reverse | CGGACTTTCTCAACACTGGG      |
| CB507 | <i>T. microellipsoides</i><br>SOD2 qPCR<br>forward  | CCTATGTCAATGGTTTCAACACTG  |
| CB508 | <i>T. microellipsoides</i><br>SOD2 qPCR<br>reverse  | GTAAAACCACCACCATGAACTTC   |
| CB510 | <i>T. microellipsoides</i><br>XRN1 qPCR<br>forward  | GAGGTTCTGTTGGTGCCGAC      |
| CB511 | <i>T. microellipsoides</i><br>XRN1 qPCR<br>reverse  | TCAACATCTGGCATTGTTGGTACTC |

| <b>Strains and Plasmids</b>                                         |                                               |                          |
|---------------------------------------------------------------------|-----------------------------------------------|--------------------------|
| <b>Strain name</b>                                                  | <b>Use</b>                                    | <b>antibiotic marker</b> |
| <i>Torulaspora microellipsoides</i><br>WT (NCYC 2568) white cells   | WT white cells                                | none                     |
| <i>Torulaspora microellipsoides</i><br>WT (NCYC 2568) opaque cells  | WT opaque cells                               | none                     |
| <i>Torulaspora microellipsoides</i><br>WT (NCYC 2568) $\Delta$ efg1 | WT white cells with <i>efg1</i> deletion      | KanMX (G418)             |
|                                                                     |                                               |                          |
| <b>Plasmid name</b>                                                 | <b>Use</b>                                    | <b>antibiotic marker</b> |
| pUC19_Tmicro_efg1                                                   | cloning of EFG1 ORF +/- 1kb                   | Ampicillin               |
| pUC19_tmicro_efg1KanMX                                              | deletion of EFG1 with ORF replaced with KanMX | Ampicillin, KanMX (G418) |
